# Supplementary material for: Nanoassemblies with Gd-chelating lipids (GMO@DTPA-BSA-Gd) as a potential new type of high molecular weight contrast agents
Source: Royal Society of Chemistry journal article supplement (doi:10.1039/d4tb01684j), 2024-01-01
Supplement: d4tb01684j1.pdf [file d4tb01684j1.pdf]

## Supplementary Information

### **Nanoassemblies with Gd-chelating lipids (GMO@DTPA-BSA-Gd) as potential new type of high molecular weight contrast agents**

Karolina Dydak,<sup>ab</sup> Tomasz Zalewski,<sup>a</sup> Marek Kempka,<sup>ab</sup> Patryk Florczak,<sup>a</sup>  
Grzegorz Nowaczyk,<sup>a</sup> Łucja Przysiecka,<sup>a</sup> Jakub Jagielski,<sup>a</sup> Benoit Loppinet,<sup>c</sup>  
Michał Banaszak,<sup>ab</sup> Dorota Flak<sup>\*a</sup>

*<sup>a</sup>NanoBioMedical Centre, Adam Mickiewicz University, Wszechnicy Piastowskiej 3,  
61-614 Poznań, Poland*

*<sup>b</sup>Faculty of Physics, Adam Mickiewicz University, Uniwersytetu Poznańskiego 2,  
61-614 Poznań, Poland*

*<sup>c</sup>Institute of Electronic Structure and Laser, Foundation for Research and Technology-Hellas,  
P.O. Box 1385, 711 10 Heraklion, Crete, Greece*

**\*Correspondence:**

Dorota Flak, NanoBioMedical Centre, Adam Mickiewicz University Poznań, Wszechnicy Piastowskiej 3,  
PL 61614 Poznań, Poland, +48 8296713, [dorfla@amu.edu.pl](mailto:dorfla@amu.edu.pl).

**Table S1** The space group and corresponding mean lattice constant obtained from the SAXS (Small Angle X-ray Scattering) spectra analysis.

| Sample             | Space group    | Lattice constant / Å |
|--------------------|----------------|----------------------|
| 2GMO-25F127        | Pn3m           | 82.79 ± 0.17         |
| 2GMO-5DTPA-10F127  | Pn3m           | 89.42 ± 0.86         |
| 2GMO-5DTPA-15F127  | Pn3m           | 90.04 ± 0.40         |
| 2GMO-5DTPA-25F127  | Pn3m           | 90.36 ± 0.02         |
| 2GMO-30DTPA-25F127 | Im3m           | 148.17 ± 0.51        |
|                    | L <sub>α</sub> | 62.93 ± 0.02         |
| 2GMO-40DTPA-25F127 | L <sub>α</sub> | 63.15 ± 0.02         |
| 2GMO-50DTPA-25F127 | L <sub>α</sub> | 63.29 ± 0.03         |

**Table S2** ICP-MS instrument settings, data acquisition parameters and calibration data.

**General conditions**

|                                         |                   |
|-----------------------------------------|-------------------|
| RF power, W                             | 1600              |
| Plasma gas flow, L min <sup>-1</sup>    | 16                |
| Auxiliary gas flow, L min <sup>-1</sup> | 1.2               |
| Nebulizer gas flow, L min <sup>-1</sup> | 1.04              |
| QID Fixed Voltage                       | -12               |
| Hyperskimmer Park Voltage               | 4                 |
| OmniRing Park Voltage                   | -200              |
| Nuclides monitored                      | <sup>158</sup> Gd |

**Analysis parameters**

|                      |      |
|----------------------|------|
| Dwell time, ms       | 50   |
| Sweeps               | 40   |
| Replicates           | 3    |
| Integration time, ms | 2000 |

Calibration data and instrumental limits of detection (LoDs) and limits of quantification (LoQs), obtained for m/z = 158 determination using ICP-MS.

**Parameter**

|            |          |
|------------|----------|
| Cor.Coeff. | 0,999216 |
| LoD (µg/L) | 0,011    |
| LoQ (ug/L) | 0,019    |

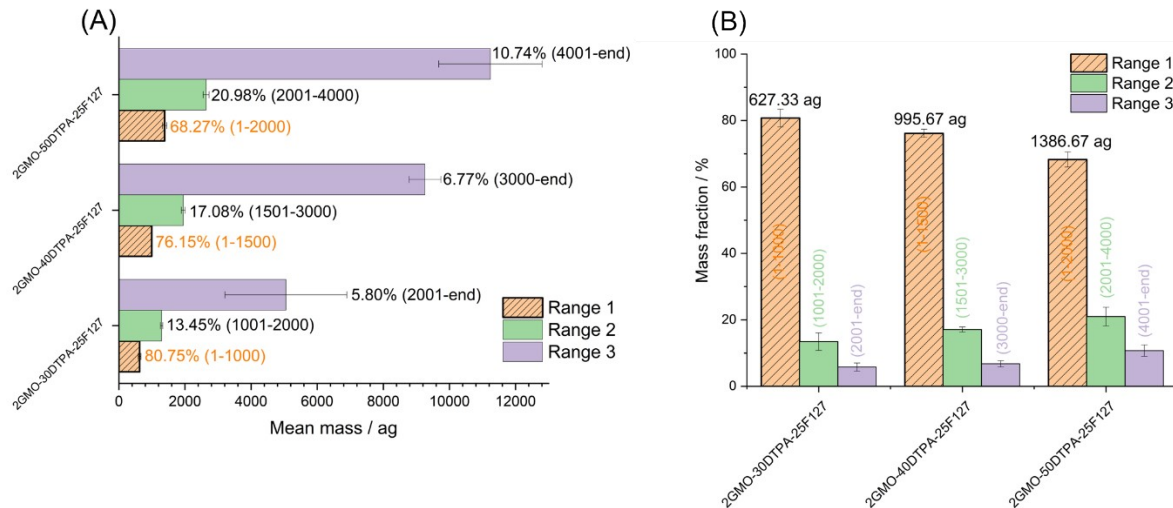

**Fig. S1** Single Cell Inductively Coupled Plasma Mass Spectrometry ((SP)-ICP-MS) uptake studies on HeLa cells treated with nanoassemblies of three different DTPA-BSA-Gd content (30, 40, 50% w/w) and 25% w/w of surfactant Pluronic F127. (A) Mean mass per analyzed nanoassemblies; (B) Percentage of mass fraction per analyzed nanoassemblies. Results show the mean mass of Gd per cell (expressed in attogram (ag)), accounted for the measured dominant single cell in terms of mean mass (Range 1, insert in the figure).

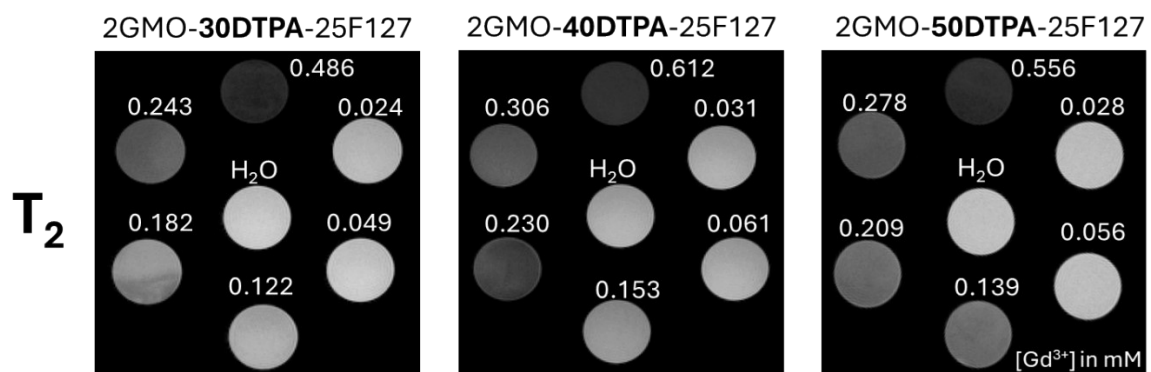

**Fig. S2** T<sub>2</sub>-weighted MR images of prepared nanoassemblies with high DTPA-BSA-Gd content (2GMO-30DTPA-25F127, 2GMO-40DTPA-25F127, 2GMO-50DTPA-25F127) at different Gd<sup>3+</sup> ion concentrations ([Gd<sup>3+</sup>] in mM), collected with a 9.4 T MRI horizontal scanner at room temperature.

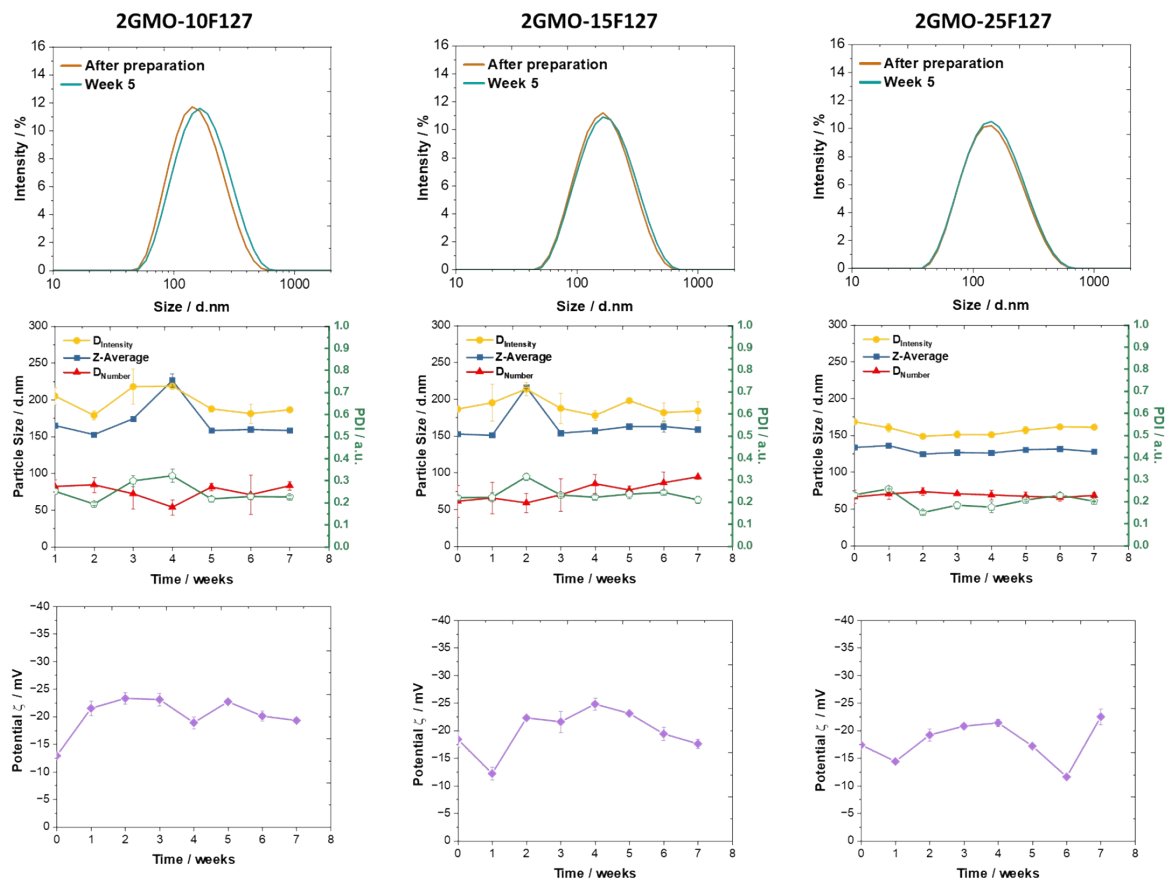

**Fig. S3** Dynamic Light Scattering (DLS) results: (top row) particle size distribution curves weighed by intensity for chosen time points (0 – after preparation and after 5 weeks), (middle row) particle size distribution weighed by intensity ( $D_{\text{Intensity}}$ ) and by number ( $D_{\text{Number}}$ ), polydispersity index (PDI), (bottom row) potential  $\zeta$  over the 7 weeks for un-modified nanoassemblies: 2GMO-10F127, 2GMO-15F127, 2GMO-25F127.

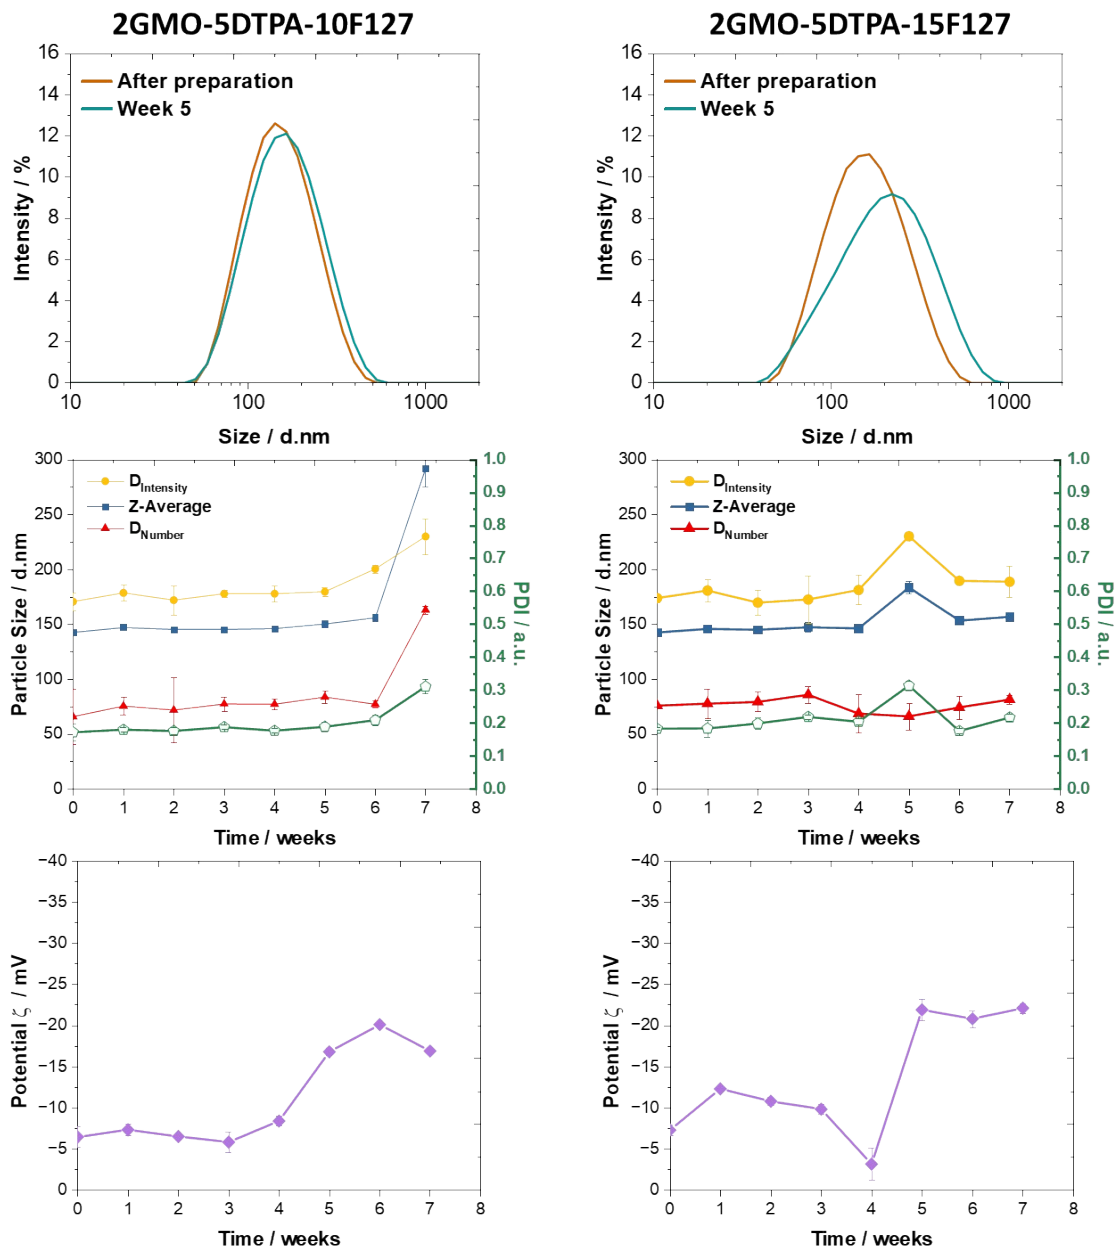

**Fig. S4** Dynamic Light Scattering (DLS) results: (top row) particle size distribution curves weighed by intensity for chosen time points (0 – after preparation and after 5 weeks), (middle row) particle size distribution weighed by intensity ( $D_{Intensity}$ ) and by number ( $D_{Number}$ ), polydispersity index (PDI), (bottom row) potential  $\zeta$  over the 7 weeks for nanoassemblies with 5% w/w of DTPA-BSA-Gd and 10% w/w (2GMO-5DTPA-10F127) and with 15% w/w (2GMO-5DTPA-15F127) of surfactant Pluronic F127.

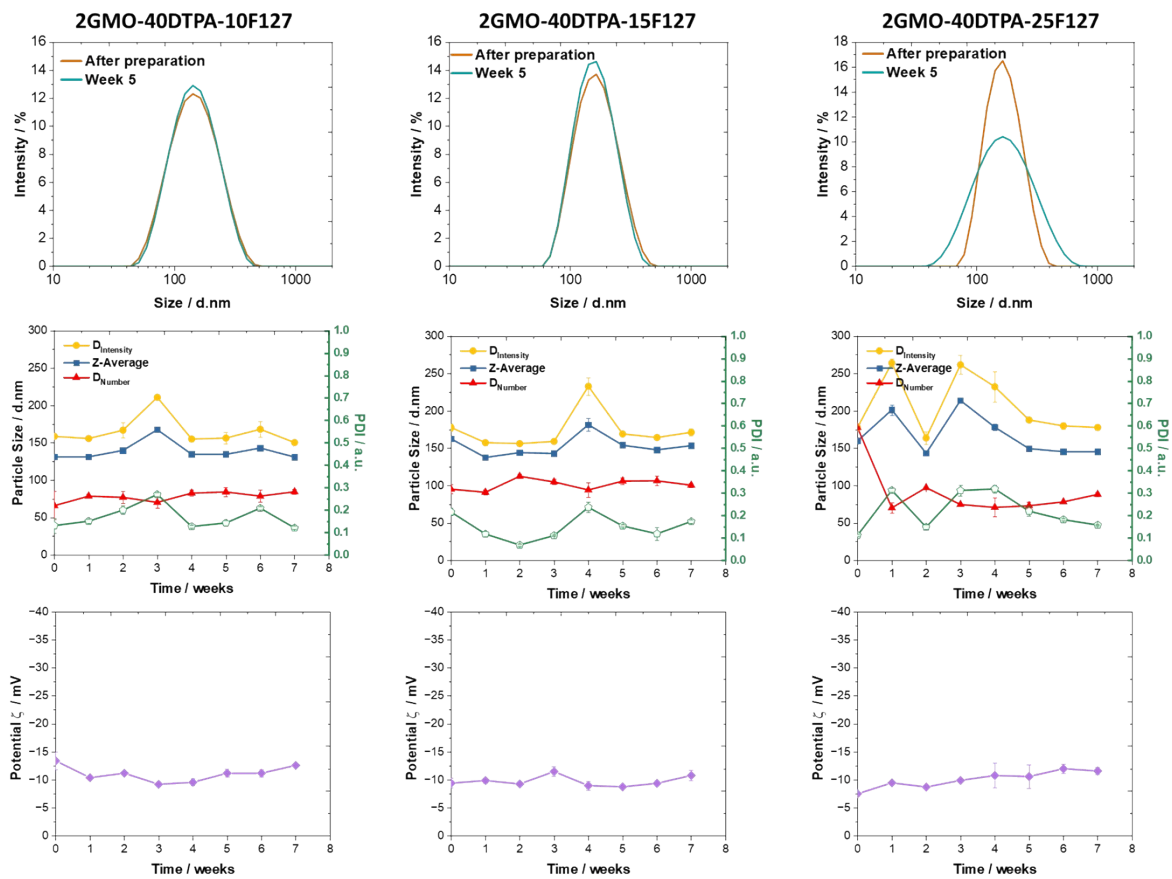

**Fig. S5** Dynamic Light Scattering (DLS) results: (top row) particle size distribution curves weighed by intensity for chosen time points (0 – after preparation and after 5 weeks), (middle row) particle size distribution weighed by intensity ( $D_{Intensity}$ ) and by number ( $D_{Number}$ ), polydispersity index (PDI), (bottom row) potential  $\zeta$  over the 7 weeks for nanoassemblies with 40% w/w of DTPA-BSA-Gd and 10% w/w (2GMO-5DTPA-10F127), 15% w/w (2GMO-5DTPA-15F127), 25% w/w (2GMO-40DTPA-25F127) of surfactant Pluronic F127.

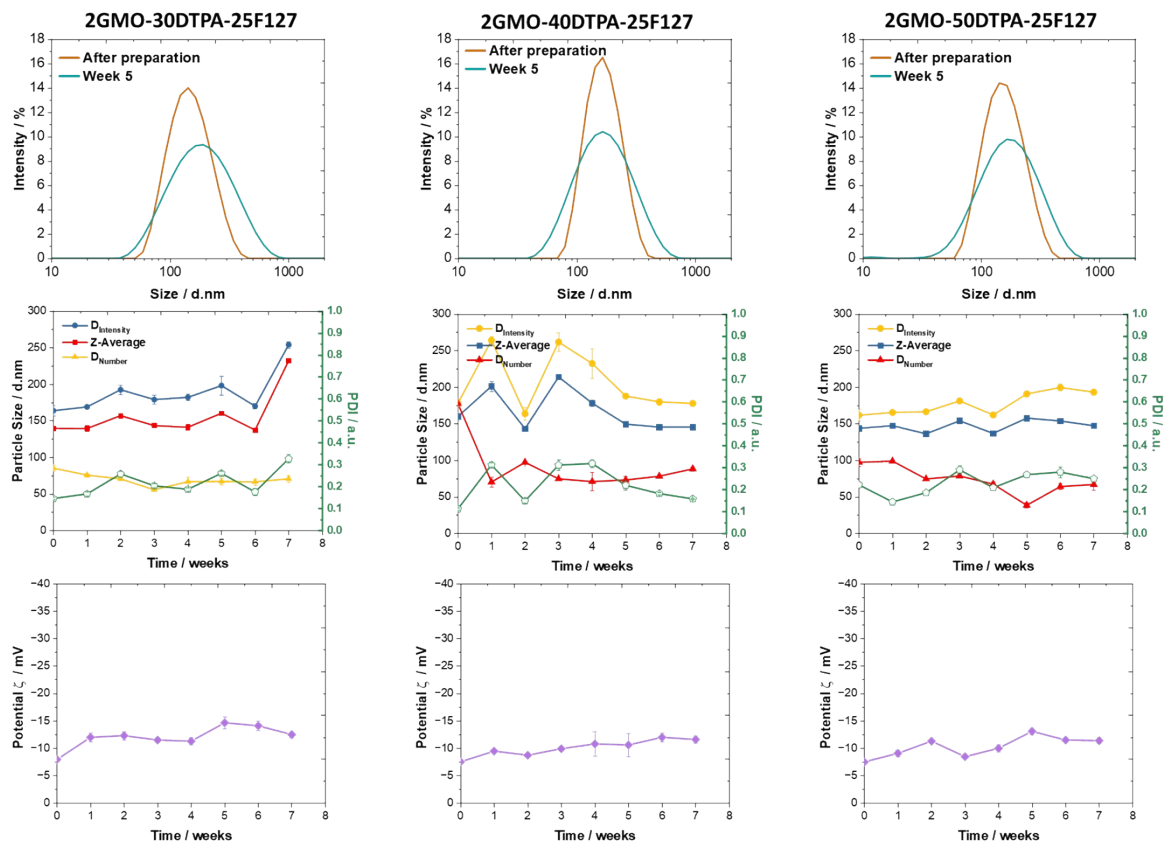

**Fig. S6** Dynamic Light Scattering (DLS) results: (top row) particle size distribution curves weighed by intensity for chosen time points (0 – after preparation and after 5 weeks), (middle row) particle size distribution weighed by intensity ( $D_{\text{Intensity}}$ ) and by number ( $D_{\text{Number}}$ ), polydispersity index (PDI), (bottom row) potential  $\zeta$  over the 7 weeks for nanoassemblies with 30% w/w (2GMO-30DTPA-25F127), 40% w/w (2GMO-40DTPA-25F127) and 50% w/w (2GMO-50DTPA-25F127) of DTPA-BSA-Gd and 25% w/w of surfactant Pluronic F127.
